# Supplementary material for: Primary Impacts of the Fungal Toxin Sporidesmin on HepG2 Cells: Altered Cell Adhesion without Oxidative Stress or Cell Death
Source: MDPI journal article supplement (doi:10.3390/toxins13030179), 2021-02-28
Supplement: s1 [file s1]

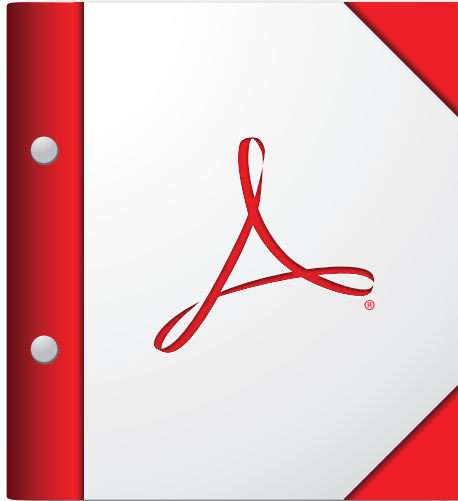

**For the best experience, open this PDF portfolio in  
Acrobat 9 or Adobe Reader 9, or later.**

**Get Adobe Reader Now!**
